# Supplementary figures and images for: Colon Cancer Cell–Derived Tumor Necrosis Factor-α Mediates the Tumor Growth–Promoting Response in Macrophages by Up-regulating the Colony-Stimulating Factor-1 Pathway
Source: Oxford University Press journal article supplement (doi:10.1158/0008-5472.can-06-2295), 2007-02-01

**Co-culture: cell-cell contact**

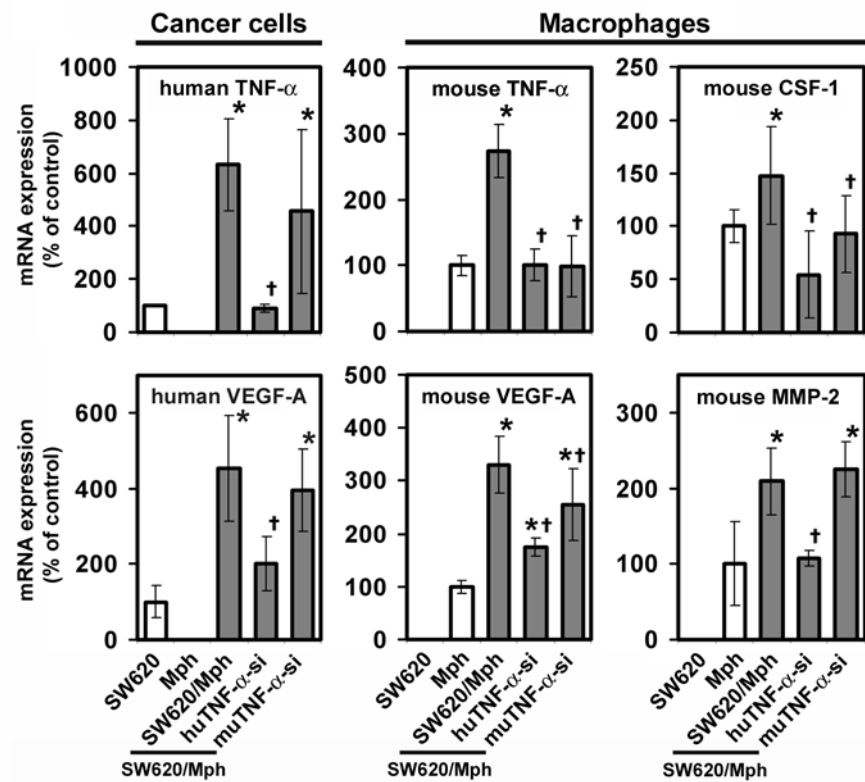

Zins et al.  
Supplementary Fig. 1

Supplement: 00085472can062295-sup-suppl_fig_1_zins.pdf [file 00085472can062295-sup-suppl_fig_1_zins.pdf]
